# Supplementary material
Source: Springer Nature journal article supplement (https://www.springermedizin.de/resource/supplementary/12969_2013_1277_MOESM2_ESM.pdf/9589208)
Supplement: MOESM2 [file 9589208]

## Documentation of the pGALS screen

Documentation of the pGALS screening assessment is important and a simple pro forma is proposed with the following example – a child with a swollen left knee with limited flexion of the knee and antalgic gait.

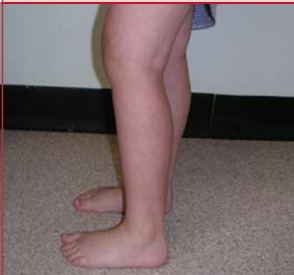

| pGALS screening questions |                                   |          |
|---------------------------|-----------------------------------|----------|
| Any pain?                 | <i>Left knee</i>                  |          |
| Problems with dressing?   | <i>No difficulty</i>              |          |
| Problems with walking?    | <i>Some difficulty on walking</i> |          |
|                           | Appearance                        | Movement |
| Gait                      |                                   | X        |
| Arms                      | ✓                                 | ✓        |
| Legs                      | X                                 | X        |
| Spine                     | ✓                                 | ✓        |
